# Supplementary material for: Effects of Clostridium butyricum on Production Performance and Bone Development of Laying Hens
Source: MDPI journal article supplement (doi:10.3390/vetsci11040160), 2024-04-01
Supplement: s1 [file s1]

Supplementary Materials:

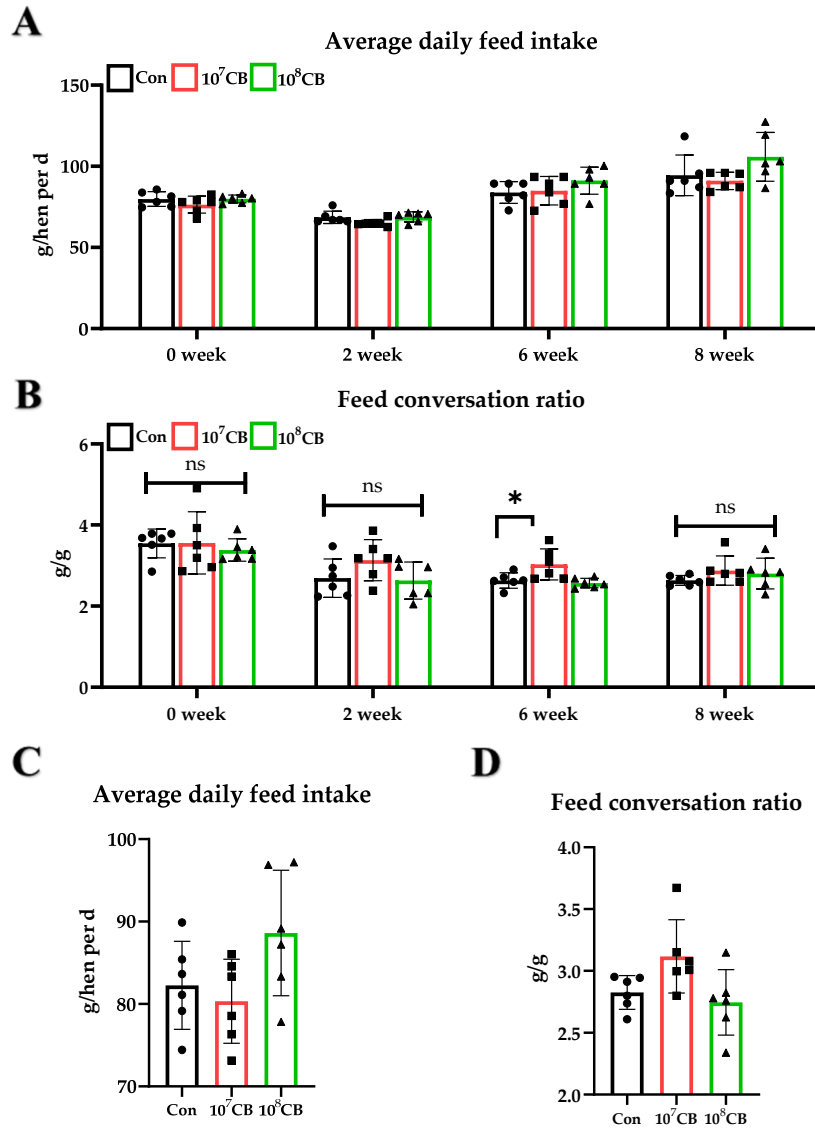

**Figure S1.** Effects of *Clostridium butyricum* (CB) on feed intake and feed conversion ratio of Luhua layer hens. (A, B) Changes in feed intake and feed conversion ratio of laying hens over time. (C) Feed intake from 1-8 weeks. (D) Feed conversion ratio from 1-8 weeks. Con: Control group fed basal diet;  $10^7$ CB: basal diet supplemented with  $1 \times 10^7$  CFU/kg CB;  $10^8$ CB: basal diet supplemented with  $1 \times 10^8$  CFU/kg CB. The data are presented as the mean  $\pm$  SD. \*,  $P < 0.05$ , ns, no difference.

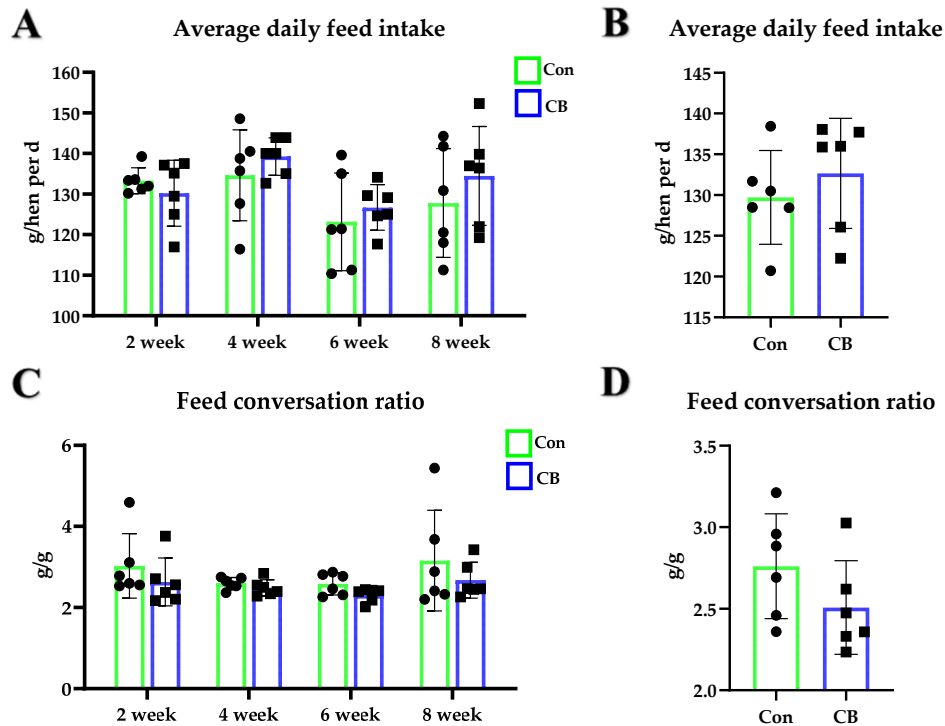

**Figure S2.** Effect of *Clostridium butyricum* (CB) on feed intake and feed conversion ratio of Hy-line Brown layer hens. (A, B) Changes in feed intake and feed conversion ratio of laying hens over time. (C) Feed intake from 1-8 weeks. (D) Feed conversion ratio from 1-8 weeks. Con: Control group fed basal diet; CB: basal diet supplemented with  $1 \times 10^8$  CFU/kg CB. The data are presented as the mean  $\pm$  SD.

**Table S1.** Effects of *Clostridium butyricum* (CB) on feed intake and growth of Green-shell layer hens<sup>1</sup>

| Productive performance  | Treatments                     |                                |                                | P =    | F =           |
|-------------------------|--------------------------------|--------------------------------|--------------------------------|--------|---------------|
|                         | Con                            | 10 <sup>8</sup> CB             | 10 <sup>9</sup> CB             |        |               |
| Body weight (g)         |                                |                                |                                |        |               |
| 28 days                 | 305.75 $\pm$ 5.72              | 302.13 $\pm$ 4.85              | 305.38 $\pm$ 5.93              | 0.8784 | F(2,21) =0.13 |
| Feed intake (g/hen/day) |                                |                                |                                |        |               |
| 0-28 day                | 207.16 $\pm$ 0.86 <sup>a</sup> | 199.75 $\pm$ 2.11 <sup>b</sup> | 199.61 $\pm$ 1.97 <sup>b</sup> | 0.0206 | F(2,9) =6.16  |

<sup>1</sup> The data are presented as the mean  $\pm$  SD. Con: Control group, fed basal diet; 10<sup>8</sup>CB: basal diet supplemented with  $1 \times 10^8$  CFU/kg CB; 10<sup>9</sup>CB: basal diet supplemented with  $1 \times 10^9$  CFU/kg CB.

<sup>a,b</sup> Means sharing different letters in the same row are significantly different ( $P < 0.05$ ).

**Table S2.** Effects of *Clostridium butyricum* (CB) on organ development of Green-shell layer hens<sup>1</sup>

|                             | Control         | 10 <sup>8</sup> CB | 10 <sup>9</sup> CB | P-value | F-value       |
|-----------------------------|-----------------|--------------------|--------------------|---------|---------------|
| Liver index, %              | 3.02 $\pm$ 0.17 | 2.71 $\pm$ 0.07    | 2.81 $\pm$ 0.06    | 0.1606  | F(2,21) =2.00 |
| Spleen index, %             | 0.27 $\pm$ 0.03 | 0.30 $\pm$ 0.03    | 0.28 $\pm$ 0.02    | 0.8175  | F(2,21) =0.20 |
| Bursa of Fabricius index, % | 0.48 $\pm$ 0.03 | 0.56 $\pm$ 0.08    | 0.45 $\pm$ 0.03    | 0.2993  | F(2,21) =1.28 |
| Thymus index, %             | 0.8 $\pm$ 0.061 | 0.95 $\pm$ 0.153   | 0.843 $\pm$ 0.051  | 0.5739  | F(2,21) =0.57 |

|                     |           |           |           |        |                           |
|---------------------|-----------|-----------|-----------|--------|---------------------------|
| Duodenum length, cm | 18.59±0.6 | 17.83±0.7 | 17.43±0.5 | 0.3831 | F <sub>(2,21)</sub> =1.00 |
| Jejunum length, cm  | 37.78±1.9 | 36.36±1.8 | 34.71±0.8 | 0.4017 | F <sub>(2,21)</sub> =0.95 |
| Ileum length, cm    | 42.44±1.8 | 42.45±1.0 | 40.83±0.9 | 0.6045 | F <sub>(2,21)</sub> =0.51 |
| Cecum length, cm    | 9.26±0.34 | 9.25±0.21 | 9.31±0.35 | 0.9886 | F <sub>(2,21)</sub> =0.01 |

<sup>1</sup> The data are presented as the mean ± SD. Con: Control group, fed basal diet; 10<sup>8</sup>CB; basal diet supplemented with 1×10<sup>8</sup> CFU/kg CB; 10<sup>9</sup>CB: basal diet supplemented with 1×10<sup>9</sup> CFU/kg CB.

**Table S3.** Effect of *Clostridium butyricum* (CB) on production performance of Luhua layer hens <sup>1</sup>.

| Productive performance                 | Treatments               |                          |                         | P =    | F =           |
|----------------------------------------|--------------------------|--------------------------|-------------------------|--------|---------------|
|                                        | Con                      | 10 <sup>7</sup> CB       | 10 <sup>8</sup> CB      |        |               |
| Egg production                         |                          |                          |                         |        |               |
| rate (%)                               |                          |                          |                         |        |               |
| 0 week                                 | 63.24±2.25               | 59.67±3.48               | 64.43±2.20              | 0.4523 | F(2,15) =0.84 |
| 2 week                                 | 63.84±3.39               | 51.64±4.02               | 63.99±4.80              | 0.0815 | F(2,15) =2.98 |
| 4 week                                 | 70.08±2.84 <sup>b</sup>  | 64.48±1.74 <sup>b</sup>  | 84.28±1.74 <sup>a</sup> | 0.0001 | F(2,15)=22.68 |
| 6 week                                 | 77.93±3.32 <sup>a</sup>  | 65.96±3.20 <sup>b</sup>  | 82.97±2.00 <sup>a</sup> | 0.0026 | F(2,15) =9.05 |
| 8 week                                 | 78.17±3.27 <sup>a</sup>  | 67.74±3.08 <sup>b</sup>  | 80.40±2.09 <sup>a</sup> | 0.0153 | F(2,15) =5.59 |
| overall period                         | 67.13±1.40 <sup>a</sup>  | 58.15±2.63 <sup>b</sup>  | 71.92±0.97 <sup>a</sup> | 0.0003 | F(2,15)=14.95 |
| Average egg weight (g)                 |                          |                          |                         |        |               |
| 0 week                                 | 35.80±0.54               | 36.87±0.69               | 36.83±0.22              | 0.2920 | F(2,15) =1.34 |
| 2 week                                 | 40.64±0.48 <sup>b</sup>  | 41.25±0.32 <sup>ab</sup> | 41.93±0.30 <sup>a</sup> | 0.0798 | F(2,15) =3.01 |
| 4 week                                 | 42.25±0.72               | 43.50±0.65               | 44.08±0.40              | 0.1259 | F(2,15) =2.39 |
| 6 week                                 | 44.24±0.59 <sup>b</sup>  | 46.12±0.54 <sup>a</sup>  | 45.97±0.29 <sup>a</sup> | 0.0287 | F(2,15) =4.54 |
| 8 week                                 | 45.80±0.63               | 47.13±0.50               | 47.00±0.40              | 0.1729 | F(2,15) =1.98 |
| overall period                         | 43.39±0.53 <sup>b</sup>  | 44.63±0.42 <sup>ab</sup> | 44.93±0.33 <sup>a</sup> | 0.0562 | F(2,15) =3.51 |
| Average daily feed intake(g/hen per d) |                          |                          |                         |        |               |
| 0 week                                 | 79.80±1.85               | 76.35±2.13               | 79.88±1.00              | 0.2881 | F(2,15) =1.35 |
| 2 week                                 | 68.53±1.55               | 65.03±0.91               | 68.82±1.27              | 0.0946 | F(2,15) =2.77 |
| 6 week                                 | 83.85±2.74               | 84.95±3.57               | 91.13±3.41              | 0.2655 | F(2,15) =1.45 |
| 8 week                                 | 94.44±5.08               | 91.01±2.18               | 105.85±6.12             | 0.1024 | F(2,15) =2.66 |
| overall period                         | 82.27±2.18 <sup>ab</sup> | 80.33±2.08 <sup>b</sup>  | 88.60±3.10 <sup>a</sup> | 0.0801 | F(2,15) =3.00 |
| Feed conversion ratio(g/g)             |                          |                          |                         |        |               |
| 0week                                  | 3.55±0.14                | 3.56±0.31                | 3.38±0.11               | 0.8051 | F(2,15) =0.22 |
| 2 week                                 | 2.69±0.19                | 3.13±0.21                | 2.63±0.19               | 0.1756 | F(2,15) =1.96 |
| 6 week                                 | 2.63±0.08 <sup>b</sup>   | 3.03±0.16 <sup>a</sup>   | 2.57±0.05 <sup>b</sup>  | 0.0138 | F(2,15) =5.78 |
| 8 week                                 | 2.64±0.05                | 2.88±0.15                | 2.80±0.15               | 0.3984 | F(2,15) =0.98 |
| overall period                         | 2.83±0.06 <sup>ab</sup>  | 3.12±0.12 <sup>a</sup>   | 2.75±0.11 <sup>b</sup>  | 0.0437 | F(2,15) =3.89 |

<sup>1</sup> The data are presented as the mean ± SD. Con: Control group, fed basal diet; 10<sup>7</sup>CB; basal diet supplemented with 1×10<sup>7</sup> CFU/kg CB; 10<sup>8</sup>CB: basal diet supplemented with 1×10<sup>8</sup> CFU/kg CB.

<sup>a,b</sup> Means sharing different letters in the same row are significantly different (*P* < 0.05).

**Table S4.** Effect of *Clostridium butyricum* (CB) on egg quality of Luhua layer hens <sup>1</sup>.

| Items                      | Con                     | 10 <sup>7</sup> CB       | 10 <sup>8</sup> CB      | P =     | F =           |
|----------------------------|-------------------------|--------------------------|-------------------------|---------|---------------|
| <b>2Week</b>               |                         |                          |                         |         |               |
| Egg shape index, %         | 1.32±0.009              | 1.32±0.035               | 1.29±0.02               | 0.5512  | F(2,15) =0.62 |
| Eggshell thickness, 0.01mm | 31.71±1.2               | 32.43±0.83               | 33.04±0.82              | 0.5189  | F(2,15) =0.69 |
| Eggshell index, %          | 10.83±0.23              | 11.09±0.16               | 11.26±0.22              | 0.4251  | F(2,15) =0.91 |
| Eggshell hardness, N       | 37.55±1.91              | 35.53±1.58               | 39.48±1.13              | 0.2125  | F(2,15) =1.72 |
| Albumen height, mm         | 4.3±0.10                | 4.1±0.18                 | 4.35±0.19               | 0.4989  | F(2,15) =0.73 |
| Egg yolk color             | 8.66±0.11               | 9.01±0.20                | 8.59±0.30               | 0.1930  | F(2,15) =1.84 |
| Yolk Index, %              | 31.73±0.52              | 28.83±1.33               | 30.92±0.65              | 0.3395  | F(2,15) =1.16 |
| Haugh unit                 | 71.91±0.98              | 70.03±1.75               | 72.19±1.9               | 0.5704  | F(2,15) =0.58 |
| <b>4Week</b>               |                         |                          |                         |         |               |
| Egg shape index, %         | 1.3±0.017               | 1.08±0.063               | 1.29±0.01               | 0.0739  | F(2,15) =3.11 |
| Eggshell thickness, 0.01mm | 29.98±0.57              | 30.8±0.82                | 32.27±1.24              | 0.4521  | F(2,15) =0.84 |
| Eggshell index, %          | 9.71±0.16               | 9.82±0.23                | 9.95±0.18               | 0.6010  | F(2,15) =0.53 |
| Eggshell hardness, N       | 39.11±0.95              | 36.74±2.15               | 38.71±1.74              | 0.6341  | F(2,15) =0.47 |
| Albumen height, mm         | 5.14±0.28               | 4.56±0.28                | 4.59±0.20               | 0.1914  | F(2,15) =1.85 |
| Egg yolk color             | 8.56±0.14               | 9.12±0.36                | 9.12±0.47               | 0.5145  | F(2,15) =0.69 |
| Yolk Index, %              | 31.03±0.63              | 30.41±0.49               | 29.56±0.48              | 0.1014  | F(2,15) =2.68 |
| Haugh unit                 | 76.49±2.21              | 69.52±2.33               | 71.63±1.59              | 0.0880  | F(2,15) =2.87 |
| <b>6Week</b>               |                         |                          |                         |         |               |
| Egg shape index, %         | 1.3±0.013               | 1.32±0.015               | 1.3±0.09                | 0.05757 | F(2,15) =0.57 |
| Eggshell thickness, 0.01mm | 30.67±0.073             | 31.61±0.7                | 31.31±0.79              | 0.7100  | F(2,15) =0.35 |
| Eggshell index, %          | 11.94±0.36              | 12.32±0.29               | 12.27±0.19              | 0.5484  | F(2,15) =0.63 |
| Eggshell hardness, N       | 37.22±2.66              | 37.44±1.88               | 39.85±1.76              | 0.7031  | F(2,15) =0.36 |
| Albumen height, mm         | 5.02±0.28               | 4.94±0.44                | 5.03±0.19               | 0.9196  | F(2,15) =0.08 |
| Egg yolk color             | 8.79±0.30               | 9.54±0.13                | 9.11±0.09               | 0.2112  | F(2,15) =1.73 |
| Yolk Index, %              | 30.04±0.50              | 29.64±0.56               | 29.49±0.43              | 0.3530  | F(2,15) =1.12 |
| Haugh unit                 | 74.82±2.36              | 72.01±2.9                | 74.26±1.39              | 0.9463  | F(2,15) =0.06 |
| <b>8Week</b>               |                         |                          |                         |         |               |
| Egg shape index, %         | 1.34±0.008              | 1.33±0.014               | 1.31±0.013              | 0.3542  | F(2,15) =1.11 |
| Eggshell thickness, 0.01mm | 30.31±0.60 <sup>b</sup> | 33.3±0.67 <sup>a</sup>   | 31.26±0.50 <sup>b</sup> | 0.0033  | F(2,15) =8.54 |
| Eggshell index, %          | 10.43±0.26              | 10.53±0.26               | 10.26±0.19              | 0.6912  | F(2,15) =0.38 |
| Eggshell hardness, N       | 31.25±2.5               | 37.53±1.73               | 36.65±1.84              | 0.2443  | F(2,15) =1.55 |
| Albumen height, mm         | 4.22±0.21               | 4.46±0.19                | 3.73±0.13               | 0.1445  | F(2,15) =2.21 |
| Egg yolk color             | 8.85±0.09               | 8.72±0.18                | 8.79±0.06               | 0.3768  | F(2,15) =1.04 |
| Yolk Index, %              | 33.21±0.59              | 32.71±0.44               | 32.26±0.60              | 0.2735  | F(2,15) =1.42 |
| Haugh unit                 | 68.13±1.75 <sup>a</sup> | 68.37±1.94 <sup>ab</sup> | 61.98±1.44 <sup>b</sup> | 0.0722  | F(2,15) =3.15 |

<sup>1</sup> The data are presented as the mean  $\pm$  SD. Con: Control group, fed basal diet; 10<sup>7</sup>CB: basal diet supplemented with 1 $\times$ 10<sup>7</sup> CFU/kg CB; 10<sup>8</sup>CB: basal diet supplemented with 1 $\times$ 10<sup>8</sup> CFU/kg CB.

<sup>a,b</sup> Means sharing different letters in the same row are significantly different ( $P < 0.05$ ).

**Table S5.** Effect of *Clostridium butyricum* (CB) on production performance of Hy-line Brown layer hens <sup>1</sup>.

| Productive performance                 | Treatments                    |                               | p values | F values      |
|----------------------------------------|-------------------------------|-------------------------------|----------|---------------|
|                                        | Con                           | CB                            |          |               |
| Egg production rate (%)                |                               |                               |          |               |
| 2 week                                 | 81.55 $\pm$ 6.80              | 86.31 $\pm$ 6.08              | 0.6130   | F(1,10) =0.27 |
| 4 week                                 | 87.50 $\pm$ 3.02              | 91.07 $\pm$ 3.02              | 0.4231   | F(1,10) =0.70 |
| 6 week                                 | 81.55 $\pm$ 3.12              | 88.69 $\pm$ 3.62              | 0.1657   | F(1,10) =2.24 |
| 8 week                                 | 73.81 $\pm$ 7.18              | 83.33 $\pm$ 5.95              | 0.3313   | F(1,10) =1.04 |
| overall period                         | 82.98 $\pm$ 4.17              | 88.93 $\pm$ 2.84              | 0.2653   | F(1,10) =1.39 |
| Average egg weight (g)                 |                               |                               |          |               |
| 2 week                                 | 56.47 $\pm$ 0.62              | 59.26 $\pm$ 1.43              | 0.1035   | F(1,10) =3.21 |
| 4 week                                 | 59.33 $\pm$ 0.83 <sup>b</sup> | 61.90 $\pm$ 1.25 <sup>a</sup> | 0.1185   | F(1,10) =2.92 |
| 6 week                                 | 58.78 $\pm$ 0.67              | 62.14 $\pm$ 0.98              | 0.0175   | F(1,10) =8.07 |
| 8 week                                 | 59.29 $\pm$ 0.87              | 61.65 $\pm$ 0.92              | 0.0903   | F(1,10) =3.51 |
| overall period                         | 58.52 $\pm$ 0.56              | 61.26 $\pm$ 1.02              | 0.0399   | F(1,10) =5.57 |
| Average daily feed intake(g/hen per d) |                               |                               |          |               |
| 2 week                                 | 133.27 $\pm$ 1.31             | 130.21 $\pm$ 3.31             | 0.4096   | F(1,10) =0.74 |
| 4 week                                 | 134.61 $\pm$ 4.57             | 139.26 $\pm$ 1.88             | 0.3698   | F(1,10) =0.88 |
| 6 week                                 | 123.15 $\pm$ 4.91             | 126.70 $\pm$ 2.29             | 0.5284   | F(1,10) =0.43 |
| 8 week                                 | 127.80 $\pm$ 5.47             | 134.46 $\pm$ 4.98             | 0.3889   | F(1,10) =0.81 |
| overall period                         | 129.71 $\pm$ 2.34             | 132.66 $\pm$ 2.76             | 0.4345   | F(1,10) =0.66 |
| Feed conversionratio(g/g)              |                               |                               |          |               |
| 2 week                                 | 3.029 $\pm$ 0.32              | 2.632 $\pm$ 0.24              | 0.3494   | F(1,10) =0.96 |
| 4 week                                 | 2.598 $\pm$ 0.06              | 2.485 $\pm$ 0.08              | 0.2909   | F(1,10) =1.24 |
| 6 week                                 | 2.581 $\pm$ 0.11              | 2.313 $\pm$ 0.07              | 0.0669   | F(1,10) =4.22 |
| 8 week                                 | 3.158 $\pm$ 0.51              | 2.676 $\pm$ 0.18              | 0.3916   | F(1,10) =0.80 |
| overall period                         | 2.761 $\pm$ 0.13              | 2.507 $\pm$ 0.12              | 0.1795   | F(1,10) =2.08 |

<sup>1</sup> The data are presented as the mean  $\pm$  SD. Con: Control group, fed basal diet; 10<sup>7</sup>CB: basal diet supplemented with 1 $\times$ 10<sup>7</sup> CFU/kg CB; 10<sup>8</sup>CB: basal diet supplemented with 1 $\times$ 10<sup>8</sup> CFU/kg CB; SB: basal diet supplemented with 1% sodium butyrate.

<sup>a,b</sup> Means sharing different letters in the same row are significantly different ( $P < 0.05$ ).

**Table S6.** Effect of *Clostridium butyricum* (CB) on egg quality of Hy-line Brown layer hens <sup>1</sup>.

| Items                      | Con              | CB               | P =    | F =           |
|----------------------------|------------------|------------------|--------|---------------|
| <b>2Week</b>               |                  |                  |        |               |
| Egg shape index, %         | 1.3 $\pm$ 0.007  | 1.28 $\pm$ 0.009 | 0.1077 | F(1,10) =3.12 |
| Eggshell thickness, 0.01mm | 36.73 $\pm$ 0.92 | 36.2 $\pm$ 0.68  | 0.8303 | F(1,10) =0.05 |
| Eggshell index, %          | 12.05 $\pm$ 0.17 | 11.85 $\pm$ 0.15 | 0.8194 | F(1,10) =0.05 |
| Eggshell hardness, N       | 48.82 $\pm$ 1.08 | 47.73 $\pm$ 1.04 | 0.3781 | F(1,10) =0.85 |
| Albumen height, mm         | 6.33 $\pm$ 0.32  | 7.36 $\pm$ 0.46  | 0.0984 | F(1,10) =3.32 |
| Egg yolk color             | 7.82 $\pm$ 0.11  | 7.12 $\pm$ 0.28  | 0.0820 | F(1,10) =3.74 |
| Yolk Index, %              | 24.48 $\pm$ 0.40 | 25.06 $\pm$ 0.40 | 0.7165 | F(1,10) =0.14 |
| Haugh unit                 | 79.10 $\pm$ 2.23 | 83.87 $\pm$ 4.06 | 0.4189 | F(1,10) =0.71 |
| <b>4Week</b>               |                  |                  |        |               |

|                            |                         |                         |        |                |
|----------------------------|-------------------------|-------------------------|--------|----------------|
| Egg shape index, %         | 1.3±0.003 <sup>a</sup>  | 1.27±0.006 <sup>b</sup> | 0.0003 | F(1,10) =30.30 |
| Eggshell thickness, 0.01mm | 35.44±0.49              | 34.65±0.4               | 0.4094 | F(1,10) =0.74  |
| Eggshell index, %          | 11.64±0.11              | 11.45±0.09              | 0.6228 | F(1,10) =0.26  |
| Eggshell hardness, N       | 48.14±1.03              | 46.73±0.8               | 0.7504 | F(1,10) =0.11  |
| Albumen height, mm         | 7.3±0.15                | 7.5±0.25                | 0.3880 | F(1,10) =0.81  |
| Egg yolk color             | 7.56±0.20               | 7.94±0.19               | 0.3797 | F(1,10) =0.84  |
| Yolk Index, %              | 26.58±0.32              | 26.34±0.16              | 0.4831 | F(1,10) =0.53  |
| Haugh unit                 | 85.41±0.85              | 85.15±1.81              | 0.9409 | F(1,10) =0.01  |
| <b>6Week</b>               |                         |                         |        |                |
| Egg shape index, %         | 1.3±0.005 <sup>a</sup>  | 1.27±0.007 <sup>b</sup> | 0.0200 | F(1,9) =7.64   |
| Eggshell thickness, 0.01mm | 35.97±0.72              | 36.54±0.5               | 0.6945 | F(1,10) =0.16  |
| Eggshell index, %          | 12.21±0.14              | 11.78±0.09              | 0.3965 | F(1,10) =0.76  |
| Eggshell hardness, N       | 45.67±1.95              | 43.32±1.77              | 0.4948 | F(1,10) =0.50  |
| Albumen height, mm         | 7.17±0.22               | 7.98±0.22               | 0.0928 | F(1,10) =3.45  |
| Egg yolk color             | 7.75±0.45               | 6.71±0.19               | 0.0652 | F(1,10) =4.29  |
| Yolk Index, %              | 26.00±0.30              | 26.78±1.05              | 0.2955 | F(1,9) =1.23   |
| Haugh unit                 | 84.32±1.73              | 87.75±1.58              | 0.3023 | F(1,10) =1.18  |
| <b>8Week</b>               |                         |                         |        |                |
| Egg shape index, %         | 1.3±0.004 <sup>a</sup>  | 1.28±0.008 <sup>b</sup> | 0.0468 | F(1,10) =5.14  |
| Eggshell thickness, 0.01mm | 34.23±0.56              | 34.27±0.4               | 0.9665 | F(1,10) =0.00  |
| Eggshell index, %          | 11.56±0.15              | 11.39±0.09              | 0.3018 | F(1,10) =1.19  |
| Eggshell hardness, N       | 44.98±1.36              | 40.98±1.39              | 0.1514 | F(1,10) =2.41  |
| Albumen height, mm         | 7.28±0.16               | 7.68±0.25               | 0.1015 | F(1,10) =3.25  |
| Egg yolk color             | 7.26±0.24               | 7.37±0.10               | 0.6359 | F(1,10) =0.24  |
| Yolk Index, %              | 27.55±0.30              | 26.69±0.18              | 0.3545 | F(1,10) =0.94  |
| Haugh unit                 | 79.88±1.10 <sup>b</sup> | 84.90±2.02 <sup>a</sup> | 0.0207 | F(1,10) =7.52  |

<sup>1</sup> The data are presented as the mean ± SD. Con: Control group, fed basal diet; CB: basal diet supplemented with 1×10<sup>8</sup> CFU/kg CB.

<sup>a,b</sup> Means sharing different letters in the same row are significantly different (*P* < 0.05).
